## **The ecological consequences and evolution of retron-mediated suicide as a way to protect bacteria from being killed by phage**

Brandon A. Berryhill<sup>1,2,3</sup>, Rodrigo Garcia<sup>1,3</sup>, Joshua A. Manuel<sup>1</sup>, Bruce R. Levin<sup>1\*</sup>

<sup>1</sup>Department of Biology, Emory University  
1510 Clifton Rd NE, Atlanta, GA, 30322, USA

<sup>2</sup>Program in Microbiology and Molecular Genetics (MMG),  
Graduate Division of Biological and Biomedical Sciences (GDBBS),  
Laney Graduate School, Emory University, Atlanta, GA, 30322, USA

<sup>3</sup>These authors contributed equally to this research

**\*Corresponding Author:** Bruce R. Levin, Emory University, 1510 Clifton Rd Atlanta, GA 30322, 404-727-2826, [blevin@emory.edu](mailto:blevin@emory.edu).

**Author Contributions:** BAB, RG, and BRL contributed to the experimental design, modelling, and analysis of the experiments as well as the writing of this report. JAM contributed to the execution of the experiments and the analysis of their results.

**Competing Interests Statement:** The authors have no competition interests to declare.

**Keywords:** Phage, Retron, Abortive infection, Population dynamics, Altruistic suicide, Bacterial defense systems

## 1 Abstract

2 For more than thirty-five years since their discovery, the function of retrons, DNA sequences that  
3 code for a reverse transcriptase and a unique single-stranded DNA/RNA hybrid called multicopy  
4 single-stranded DNA (msDNA), in bacteria were unknown. Less than two years ago, compelling  
5 evidence was presented that retrons can protect bacteria from infections from lytic phage via an  
6 abortive infection mechanism. When infected with the virulent mutant of the phage lambda,  $\lambda^{\text{VIR}}$ ,  
7 and to a lesser extent other lytic phages, the retron designated Ec48 is activated, the *Escherichia*  
8 *coli* bearing this element die, and the infecting phage is lost. Using mathematical models and  
9 experiments with *E. coli* and  $\lambda^{\text{VIR}}$  we tested the hypothesis that Ec48 as an abortive infection  
10 system protects populations of bacteria from infection with lytic phage and we also tested the  
11 hypothesis that phage-mediated selection is responsible for the evolution and maintenance of  
12 retrons. The results of this jointly theoretical and experimental investigation question this  
13 ecological role of retrons, and lytic phage as the selective pressure responsible for the evolution  
14 and maintenance of retrons in bacterial populations. We found that when confronted with phage,  
15 the retrons fail to provide an advantage to bacteria in mixed (retron<sup>+</sup> and retron<sup>-</sup>) populations.  
16 Ultimately, bacteria with classical phage resistance are selected over bacteria utilizing retron-  
17 mediated abortive infection.

18

## 19 Significance Statement

20 For thirty-six years, retrons have been known in bacteria. There have been numerous studies of  
21 the molecular biology and distribution of retrons. Recently, retrons have been used for genome  
22 editing, and are a tool considered to rival CRISPR-Cas for this purpose. However, only two years  
23 ago a function was identified for retrons: protection against infections with lytic bacteriophage.  
24 With a combination of mathematical modeling and experiments with retron-encoding *E. coli* we  
25 explore the ability of the retrons to protect bacterial populations from bacteriophage and the  
26 selective pressures responsible for their evolution. The results of this jointly theoretical and  
27 experimental study question whether protection against phage is the selective force responsible for  
28 the evolution and maintenance of retrons in bacterial populations.

## 29 Introduction

30 Retrons, DNA sequences that code for a reverse transcriptase and a unique single-stranded  
31 DNA/RNA hybrid called multicopy single-stranded DNA (msDNA), were first discovered in 1984  
32 (1) and were the first example of a reverse transcriptase coded for by bacteria (2, 3). Retrons were  
33 initially found in *Mycococcus xanthus*, but subsequently have been found in a number of bacterial  
34 species, including *Escherichia coli* (4, 5). Like CRISPR-Cas, retons are being employed for  
35 genome engineering (5-7), and are capable of doing editing tasks that cannot be done by CRISPR-  
36 Cas (8). As was the case with CRISPR-Cas (9), for most of the time since its discovery the function  
37 of retons was not known. That changed less than two years ago. Millman and collaborators  
38 presented compelling evidence that retons in *E. coli* can defend against infections with lytic  
39 phages (10).

40 The mechanism by which retons protect bacteria from lytic phages is known as abortive infection  
41 (abi), in which the infected cell dies and the infecting phage is lost (11). From an evolutionary  
42 perspective, abi is intriguing. With other anti-phage defenses, like envelope resistance, restriction-  
43 modification, and most CRISPR-Cas systems in the presence of phage, these defense mechanisms  
44 are to the advantage of the individual bacteria expressing them. That is not the case for abortive  
45 infection. It has been postulated that abi is an altruistic character which provides an advantage to  
46 the population of clonal bacteria coding for these defense genes (12, 13). Individual cells that  
47 commit suicide due to phage infection, prevent the phage from infecting and killing other members  
48 of the population.

49 Previous work on abortive infection systems have shown the conditions under which abi systems  
50 have an advantage, and therefore, have provided a framework for testing other potential abortive  
51 systems. Fukuyo and colleagues as well as Berngruber and colleagues (12, 13), showed the  
52 protective role of abortive-infection mechanisms including specific conditions such as physically-  
53 structured environments. Consequently, our Ec48 retron, which activates an abortive infection  
54 system, should be able to protect in similar conditions, however, both of these studies neglected to  
55 consider the contribution of classical resistance in their models and experiments with abortive  
56 phage infection.

57 Using a mathematical model of the population and evolutionary dynamics of bacteria and phage  
58 in mass culture, we explore the capacity of retron-mediated abortive infection to protect  
59 populations of bacteria from infection by lytic phages. We further explore the ability of phage-  
60 mediated selection to favor retron-mediated immunity over envelope resistance. Using the retron-  
61 encoding *E. coli* employed by Millman and colleagues (10) and a virulent mutant of the phage  
62 lambda,  $\lambda^{\text{VIR}}$ , in liquid and structured (soft agar) cultures, we test the hypotheses generated from  
63 our theoretical analysis and those of Fukuyo and colleagues (12) and Berngruber and colleagues  
64 (13). The results of our experiments support the proposition that both in liquid and physically  
65 structured communities, retons can protect populations of bacteria from infection by phage, but  
66 only when there are no other phage-sensitive bacterial populations supporting the replication of  
67 these bacterial viruses. Our results imply, consistent with the predictions of our models, that our  
68 abi system must be nearly 100% effective. These experiments also confirm the prediction that in  
69 mass, liquid culture with phage, retons cannot evolve (increase when rare) in communities of  
70 bacteria without this defense system. Contrary to the prediction and experimental observations of  
71 Fukuyo and colleagues (12) our soft agar experiments suggest that even in this physically  
72 structured habitat, in the presence of phage, retons cannot evolve solely by triggering abortive  
73 infection. The results of our experiments also provide evidence that the retron-mediated abi is only

74 one element of this protection and invasion process. Within short-order of the bacterial populations  
 75 confronting phage in liquid and soft agar culture,  $\lambda^{\text{VIR}}$  resistant retron<sup>+</sup> and retron<sup>-</sup> bacteria emerge  
 76 and become the dominant populations of bacteria.

77

## 78 Results

### 79 A model of retron-mediated abortive infection

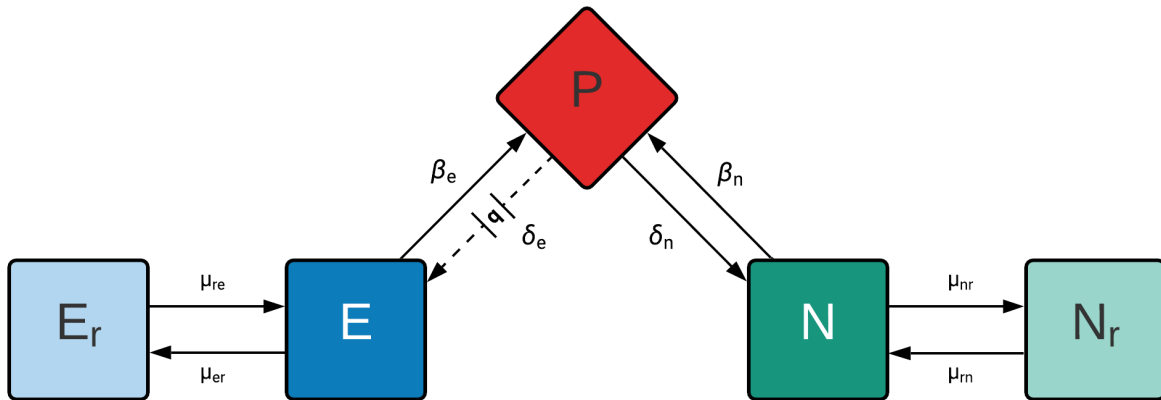

80

81

82

83 **Figure 1.** Model of the population and evolutionary dynamics of lytic phage with retron-mediated  
 84 abortive infection. There are five populations: a lytic phage, P; a phage-sensitive retron-encoding  
 85 (retron<sup>+</sup>) population, E; a phage-resistant retron<sup>+</sup> population, E<sub>r</sub>; a phage-sensitive (retron<sup>-</sup>)  
 86 population, N; and a phage-resistant (retron<sup>-</sup>) population, N<sub>r</sub>. The phage can adsorb at rates  $\delta_n$  and  
 87  $\delta_e$  to the N and E populations and replicate on N but only on a fraction (1-q) of the E population,  
 88 bursting  $\beta_n$  and  $\beta_e$  phages particles, respectively. Bacteria can transition to ( $\mu_{nr}$ ,  $\mu_{er}$ ) and from ( $\mu_{rn}$ ,  
 89  $\mu_{re}$ ) their resistant and phage-sensitive states.

90 To build the theoretical background to generate our hypotheses, design our experiments, and to  
 91 interpret their results, we generated a mathematical model. This model is based on the interactions  
 92 of the populations illustrated in Figure 1, along with the definitions and assumptions detailed in  
 93 the methods section. In accord with this model, the rates of change in the densities of bacteria and  
 94 phage and the concentration of the limiting resource are given by the system of time-dependent,  
 95 coupled differential equations listed in Equations (1) – (6).

$$\Psi(R) = \frac{R}{R+K}$$

Eq. (1)

$$\frac{dR}{dt} = -\Psi(R) \cdot e \cdot (v_n \cdot N + v_{nr} \cdot N_r + v_e \cdot E + v_{er} \cdot E_r)$$

Eq. (2)

$$\frac{dN}{dt} = \Psi(R) \cdot (v_n \cdot N - \delta_n \cdot N \cdot P + (\mu_{rn} \cdot N_r - \mu_{nr} \cdot N))$$

Eq. (3)

$$\frac{dN_r}{dt} = \Psi(R) \cdot (v_{nr} \cdot N_r - (\mu_{rn} \cdot N_r - \mu_{nr} \cdot N))$$

Eq. (4)

$$\frac{dE}{dt} = \Psi(R) \cdot (v_e \cdot E - (\mu_{re} \cdot E_r - \mu_{er} \cdot E))$$

Eq. (5)

$$\frac{dE_r}{dt} = \Psi(R) \cdot (v_{er} \cdot E_r - (\mu_{re} \cdot E_r - \mu_{er} \cdot E))$$

Eq. (6)

$$\frac{dP}{dt} = \Psi(R) \cdot (\delta_n \cdot \beta_n \cdot P \cdot N - \delta_e \cdot P \cdot q \cdot E + (1 - q) \cdot \delta_e \cdot P \cdot E \cdot \beta_e)$$

Eq. (7)

### 110 Computer simulations of the population densities in retron-mediated protection against phage 111 infection

112 We open this consideration of the population and evolutionary dynamics of retron-mediated  
113 abortive phage infection with an analysis of the ability of retrons to provide populations protection  
114 from predation by lytic phage. For this theoretical and the subsequent experimental considerations  
115 of retron-mediated abi, we present the predicted and observed densities of bacteria and phage when  
116 their populations first encounter each other, time 0, and at 24 hours (Figure 2). The values of the  
117 parameters used in these simulations are listed in the legends to this figure and Table S1. We  
118 performed an analysis to determine the minimum efficacy of retron-mediated abortive infection  
119 needed to protect populations from phage infection based on a range of values of abi effectiveness  
120 (q of 0.1 to 1.0, with steps of 0.01). We found that at least 98% of the population had to abort the

121 infection to protect the population from phage. In other words,  $q$  must be at least 0.98 for retron-  
 122 mediated abi to be protective. With these results in mind, we selected a  $q$  value of 1.00 and 0.95,  
 123 to illustrate abortive infection success and failure, respectively figures 2A and 2B.

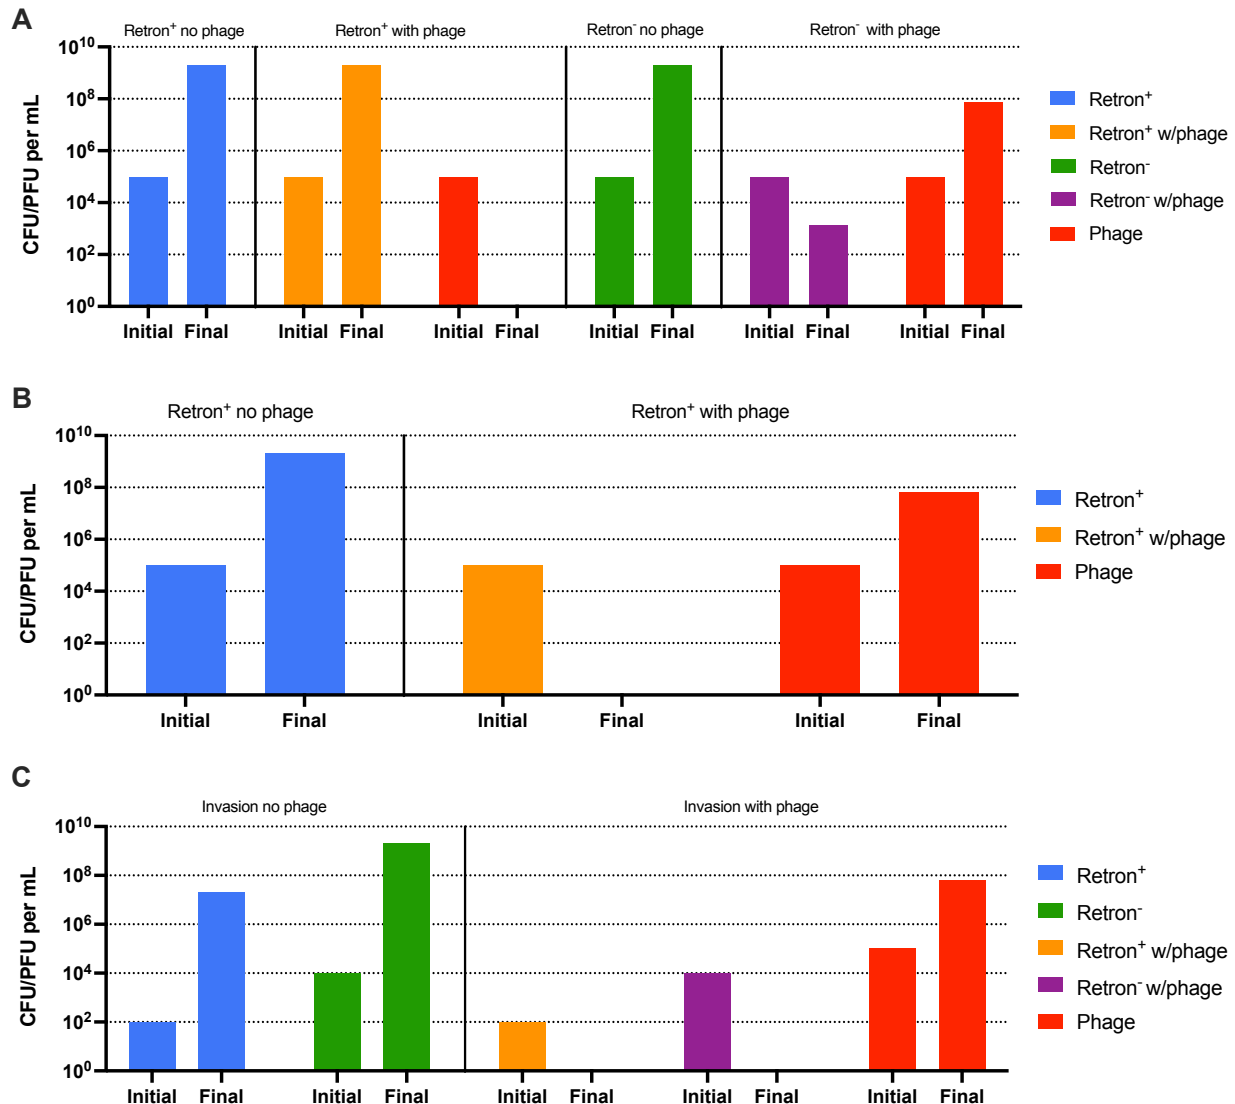

124  
 125 **Figure 2.** Computer simulation results without resistance. Changes in the densities of a retron<sup>+</sup>  
 126 bacterial population in the absence (blue) and presence (orange) of phage (red) and a retron<sup>-</sup>  
 127 bacterial population in the absence (green) and presence (purple) of phage at 0 (Initial) and 24  
 128 hours (Final). Standard parameters,  $k=1$ ,  $e=5 \times 10^{-7}$   $\mu\text{g}/\text{cell}$ ,  $v_e = v_n = 2.0 \text{ h}^{-1}$ ,  $\delta_e = \delta_n = 2 \times 10^{-7} \text{ h}^{-1} \text{ cell}^{-1}$ ,  
 129  $\beta_a = \beta_n = 60 \text{ phages}/\text{cell}$ ,  $\mu_{nr} = \mu_{rn} = \mu_{er} = \mu_{re} = 0$ . **A-** A completely effective ( $q=1.00$ ) retron positive  
 130 (retron<sup>+</sup>) bacterial population in the absence and presence of phage. **B-** An incompletely effective  
 131 ( $q=0.95$ ) retron<sup>+</sup> in the absence and presence of phage. **C-** Invasion of a completely effective  
 132 ( $q=1.00$ ) retron<sup>+</sup> population into a high density of retron<sup>-</sup> bacteria in the absence and presence of  
 133 phage.

134

135 As can be seen in Figure 2A, a completely effective retron-mediated abi defense system ( $q=1.00$ )  
136 is able to protect a population of retron<sup>+</sup> bacteria from predation by phage. By 24 hours, the phage  
137 population is gone and the retron<sup>+</sup> population is at its maximum density. When the retron<sup>-</sup> are  
138 confronted with phage, by 24 hours the bacteria are present at a low density, but there is a  
139 substantial density of free phage. The ability of the retron to prevent the ascent of the phage and  
140 protect the bacterial population is critically dependent on the efficacy of retron-mediated abortive  
141 infection (Figure 2A, 2B). When a mixed initial population of the retron<sup>+</sup> and retron<sup>-</sup> bacteria are  
142 confronted with phage, the phage replicate on the retron<sup>-</sup> cells, the phage population increases in  
143 density and the retron<sup>+</sup> bacteria not only doesn't become established but is lost entirely (Figure  
144 2C).

145

146 In Figure 3, we present the results of our experimental tests of the retron protection hypotheses  
147 presented in Figure 2 using the retron<sup>+</sup> *E. coli* Ec48 (10) and a lytic mutant of the phage lambda,  
148  $\lambda^{\text{VIR}}$ . As a retron<sup>-</sup> control, we use a  $\lambda^{\text{VIR}}$  sensitive *E. coli* C. As anticipated from the model (Figure  
149 2A), when confronting the retron<sup>+</sup> population by 24 hours, the  $\lambda^{\text{VIR}}$  population is gone or nearly  
150 so, and the bacterial density is at the level of a phage-free control (Figure 3A). The results of the  
151 control experiment with the  $\lambda^{\text{VIR}}$  and the retron<sup>-</sup> sensitive strain are inconsistent with the prediction  
152 of the model (Figure 2B). As anticipated by the model, the phage density increased over the 24  
153 hours, but contrary to what is expected from the model (Figure 2A), the bacteria are not lost, but  
154 rather increased to the density anticipated in the absence of phage (Figure 3B). Also contrary to  
155 the prediction of the model (Figure 2C), in the presence of phage, the retron<sup>+</sup> population does not  
156 become extinct when initially rare relative to the retron<sup>-</sup> cells line. One possible reason for this, is  
157 that the bacteria recovered at 24 hours from the retron<sup>-</sup> population are resistant to  $\lambda^{\text{VIR}}$ . To test this  
158 hypothesis, we employed the cross-streak method on colonies isolated at 24 hours to determine  
159 their susceptibility to  $\lambda^{\text{VIR}}$  (Table S3). By this criterion, the vast majority of the initially sensitive  
160 retron<sup>-</sup> bacteria recovered at 24 hours are resistant to  $\lambda^{\text{VIR}}$ . This is also the case for the retron<sup>+</sup>  
161 bacteria recovered at 24 hours.

162

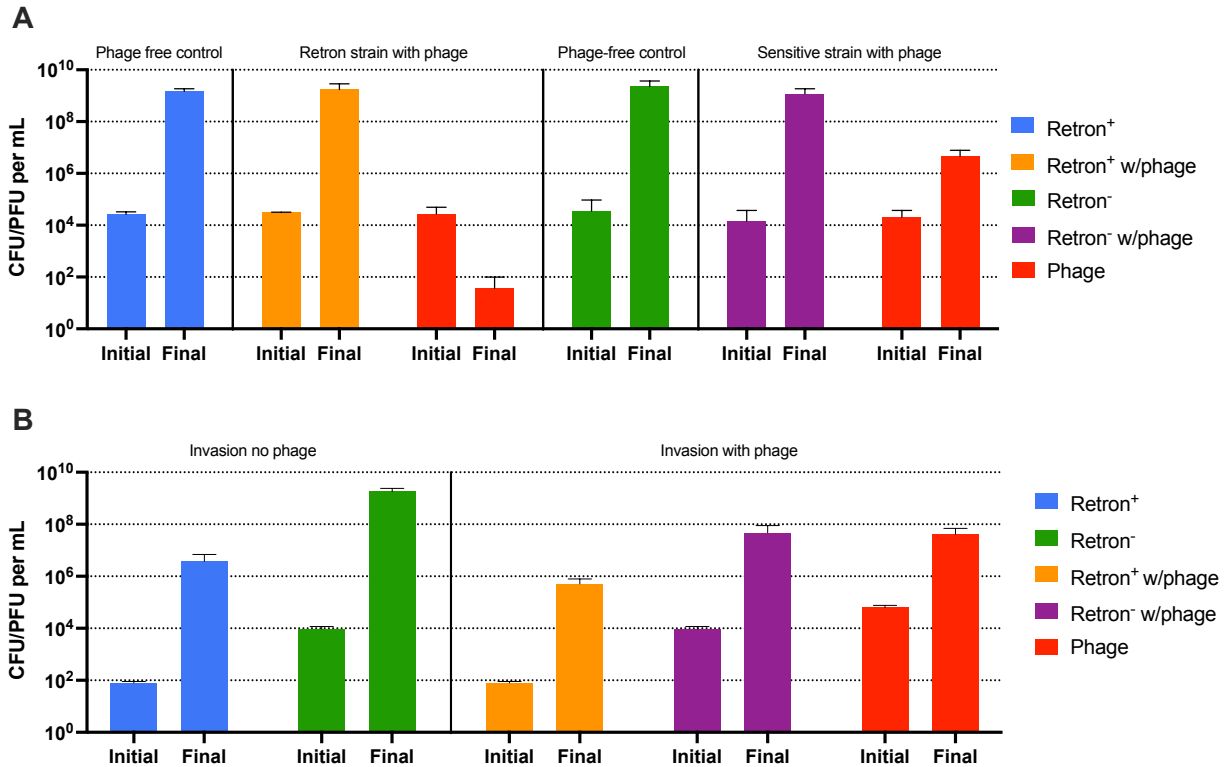

163

164 **Figure 3.** Experimental results, changes in the densities of bacteria and phage at 0 (Initial) and  
 165 24 (Final) hours. Retron<sup>+</sup> bacteria in the absence of phage (blue) and in the presence of  $\lambda^{\text{VIR}}$   
 166 (orange), a retron<sup>-</sup> population of bacteria in the absence (green) of phage (red) and in the  
 167 presence (purple) of phage. The data are the means and standard errors of the phage and bacterial  
 168 densities of three independent replicas. **A-** Retron<sup>+</sup> and a retron<sup>-</sup> populations in the absence and  
 169 presence of the lytic phage  $\lambda^{\text{VIR}}$ . **B-** Invasion experiments. A co-culture of a low density of  
 170 retron<sup>+</sup> bacteria and a high density of retron<sup>-</sup> bacteria in the absence and presence of  $\lambda^{\text{VIR}}$ .

171 To elucidate the reasons for the deviation from the predictions of the model, we performed new  
 172 computer simulations with our model, but now allowed for the generation of a  $\lambda^{\text{VIR}}$  resistant retron<sup>+</sup>  
 173 population ( $E_r$ ) and a  $\lambda^{\text{VIR}}$  resistant retron<sup>-</sup> ( $N_r$ ) bacterial population (Figure 1). As noted in  
 174 Chaudhry et al (14), there is a high rate of generation of  $\lambda^{\text{VIR}}$  resistant bacteria for *E. coli*,  
 175 suggesting transition rates,  $\mu_{er}$  and  $\mu_{re}$ , of  $10^{-5}$  per cell per hour. If we allow for that high transition  
 176 rate for sensitive retron<sup>-</sup> cells,  $\mu_{nr}$  and  $\mu_{rn}$  of  $10^{-5}$  per cell per hour, both the phage and resistant  
 177 bacteria ascend (Figure 4). This parallels our observation in the previous experiments with  $\lambda^{\text{VIR}}$   
 178 and a sensitive *E. coli* (Figure 3C). This is consistent with what we observed. If we allow for phage  
 179 resistant mutants to be generated in our model, the retron<sup>+</sup> population can increase in density  
 180 (Figure 4B, hashed orange), but the dominant population will be phage-resistant retron<sup>-</sup> cells  
 181 (Figure 4B, hashed purple).

182

183

184

185





## 201 Retron-mediated abortive infection in a physically structured environment

202 With our demonstration of the failure of retrons to evolve in well-mixed culture, we performed  
203 parallel experiments in structured environments comparable to those employed by Fukuyo and  
204 colleagues (12). To explore the contribution of physical structure we performed the retron  
205 protection and the invasion when rare experiments depicted in Figure 3B in soft agar. As observed  
206 in liquid culture, in the physically structured habitat of soft agar, retron-mediated abi system  
207 protect the bacterial population from being killed off by the phage and prevents the replication of  
208 the phage (Figure 5). The retron-lacking population grows to maximum density and the phage are  
209 lost. As observed in liquid culture (Figure 3B), the retron<sup>+</sup> population is not favored by phage-  
210 mediated selection. Also, as observed in liquid culture, all of the  $\lambda^{\text{VIR}}$  exposed bacteria recovered  
211 at 24 hours were resistant to the phage (Table S3).

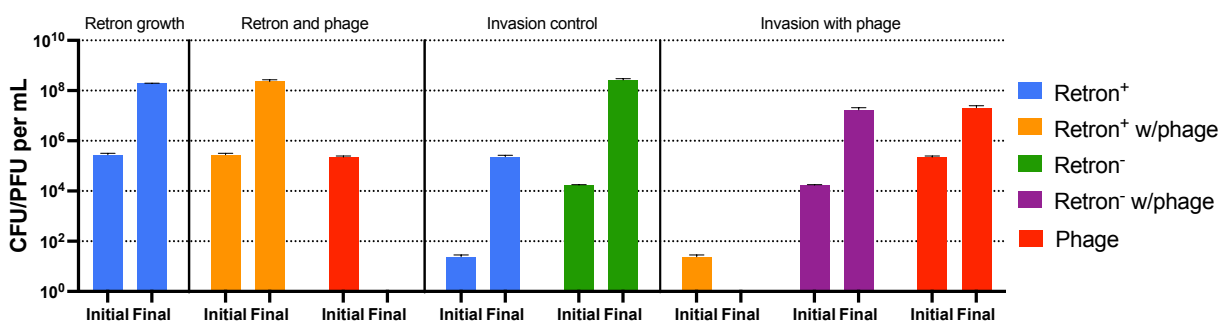

212  
213 **Figure 5.** Experimental replicates of the results presented in Figure 3, but in a structured  
214 environment, presented as means and standard errors from three independent replicas. Shown are  
215 the densities of retron<sup>+</sup> (blue) and retron<sup>-</sup> (green) bacteria in the absence of phage, and the densities  
216 of retron<sup>+</sup> (orange) and retron<sup>-</sup> bacteria (purple) in the presence of phage (red).

## 217 **Discussion**

218 Our mass action (liquid culture) models predict that a retron-mediated abortive infection system  
219 can prevent the populations of bacteria coding for them from being invaded by lytic phages, but  
220 only if the retron-mediated abi is nearly completely effective and when there are no other bacterial  
221 populations that can support the replication of the phage. The results of our experiments, like those  
222 of Millman and colleagues (10) with the retron-encoding abortive infection system in *E. coli*, Ec48,  
223 and the phage  $\lambda^{\text{VIR}}$ , are consistent with these predictions. In addition to this protection result  
224 occurring in liquid culture, our results demonstrate that this protection against lytic phages happens  
225 in physically structured populations of bacteria maintained in soft agar. Our model also predicts if  
226 retron-mediated abortive infection is less than 98% effective, with more than 2% of infections  
227 being lytic and producing phage, or when there are retron<sup>-</sup> populations that can support the  
228 replication of the phage, retrons will not be able to protect a population from predation by lytic  
229 phages. We were unable to formally test this < 98% efficacy hypothesis experimentally, because  
230 our experimental results show that the retron-mediated abortive infection is overshadowed by  
231 selection for resistance to the phage. However, since our retron<sup>+</sup> population was capable of  
232 eliminating the phage population when alone, we interpret this to suggest that the efficacy of the  
233 Ec48 abortive infection system is over 98%. Even though this retron-mediated abortive infection  
234 system is highly effective, when the bacteria are capable of generating envelope resistant mutants,

235 in the presence of phage, retron<sup>+</sup> or retron<sup>-</sup> resistant mutants ascend to dominate the bacterial  
236 populations.

237 Our model predicts that even if a retron-mediated abi defense system is 100% effective in  
238 preventing lytic phage replication, and there is an abundance of phage, the retron<sup>+</sup> population will  
239 not be able to evolve by abortive infection alone. Stated another way, retron<sup>+</sup> bacteria will not be  
240 able to become established in a population of retron<sup>-</sup> bacteria of similar fitness. Our experiments  
241 testing this hypothesis were consistent with this prediction. In liquid culture, the retron-expressing  
242 populations were unable to become established in populations dominated by retron<sup>-</sup> competitors.  
243 In these experiments, the *E. coli* population surviving this encounter with  $\lambda^{\text{VIR}}$ , was dominated by  
244 retron-lacking  $\lambda^{\text{VIR}}$  resistant mutants.

245 Our failure to see the ascent of retron<sup>+</sup> bacteria in soft agar is inconsistent with the prediction of  
246 the agent-based models Fukuyou and colleagues (12) and Bergruber and colleagues (13) which  
247 demonstrated that in physically structured communities, there are conditions where, in the  
248 presence of phage, bacteria with abi systems can invade and become established in populations  
249 dominated by abi<sup>-</sup> cells sensitive to that phage. By adding  $\lambda$  phage bearing a DNA  
250 methyltransferase Fukuyo and colleagues (12) constructed an *E. coli* with an abi system. Upon  
251 infections with a clear mutant of the phage lambda,  $\lambda^{\text{CL}}$  (which cannot form lysogens) cells with  
252 this abi construct die and the infecting phage is lost. In the physically structured habitat of soft  
253 agar (12, 15), in the presence  $\lambda^{\text{CL}}$  this abi-encoding *E. coli* has an advantage over *E. coli* without  
254 this abi system, but not in a habitat without this structure. Similar results were obtained by  
255 Berngruber and colleagues (13) with a *lit* mutant *E. coli* which, upon infection with the lytic phage  
256 T6, dies and aborts the infection. In their experiments with *E. coli* growing as colonies in structured  
257 environments, depending on the number and size of the colonies, bacteria with their *lit* abi system  
258 were substantially more fit than the competing population of abi<sup>-</sup> *E. coli*. In neither of these studies,  
259 was the abortive infection able to evolve in liquid culture. Contrary to the results of Fukuyo and  
260 colleagues (12), with the retron-mediated abi  $\lambda^{\text{VIR}}$  system used in this study, the retron-encoding  
261 population was unable to evolve in the physically structured habitat of soft agar.

262

263 We end on a somewhat philosophical note. People commonly assume that the phenotype observed  
264 is the object of natural selection. For example, resistance generated by modifications of the  
265 receptor sites to which phage adsorb evolves through selection mediated by phage. That selection  
266 can be easily demonstrated by exposing sensitive bacteria to phage. There is, however, another  
267 side to this. Clearly, the receptor sites to which the phage adsorb did not evolve to adsorb phage,  
268 no more than CRISPR and retrons evolved to enable molecular biologists to do genome editing.  
269 Throughout this investigation we, and almost all of the abortive infection articles cited, implicitly  
270 or explicitly assert that abi evolved in response to selection mediated by phage. Could it be that  
271 retrons and other abi systems evolved and are maintained by selection for factors other than as  
272 defenses against phage infection?

## 273 **Materials and Methods**

### 274 **Mathematical modelling**

275

276 In Figure 1, we illustrate our model of the population dynamics of lytic phage and bacteria with  
277 and without a retron-mediated abortive infection system and envelope resistance. There is a single  
278 population of phage, P, particles per ml and four bacterial populations of bacteria, E, E<sub>r</sub>, N, and N<sub>r</sub>  
279 cells per ml. The phage sensitive retron population, E, has a functional abi system. Though it also  
280 has a function abi system, the E<sub>r</sub> population is refractory to the phage. The N and N<sub>r</sub> populations  
281 are retron negative, retron<sup>-</sup>, that are, respectively sensitive and resistant to the phage. When a phage  
282 infects a bacterium of state E, there is a probability q (0 ≤ q ≤ 1), that the bacteria will die and the  
283 infecting phage will be lost. The N population and 1-q of the E population support the replication  
284 of the phage while E<sub>r</sub> and N<sub>r</sub> are refractory to the phage.

285 The bacteria grow at maximum rates, v<sub>e</sub>, v<sub>er</sub>, v<sub>n</sub>, and v<sub>nr</sub>, per cell per hour, for E, E<sub>r</sub>, N and N<sub>r</sub>,  
286 respectively with the net rate of growth being equal to the product of maximum growth rate, v<sub>max</sub>  
287 and the concentration of a limiting resource, r μg/ml, v<sub>max</sub>\*ψ(R) (16), Eq (1). The parameter k, the  
288 Monod constant, is the concentration of the resource, at which the net growth rate of the bacteria  
289 is half its maximum value. By mutation or other processes, the bacteria change states, E→E<sub>r</sub> and  
290 E<sub>r</sub>→E at rates μ<sub>er</sub> and μ<sub>re</sub>, per cell per hour, and N→N<sub>r</sub> and N<sub>r</sub>→N at rates μ<sub>nr</sub> and μ<sub>rn</sub>.

291 The limiting resource is consumed at a rate equal to the product of ψ(R), a conversion efficiency  
292 parameter, e μg/cell (17) and the sum of products of the maximum growth rates of the bacteria and  
293 their densities. We assume phage infection is a mass action process that occurs at a rate equal to  
294 the product of the density of bacteria and phage and a rate constants of phage infection, δ<sub>e</sub> and δ<sub>n</sub>  
295 (ml·cells/hour) for infections of E and N, respectively (18). Infections of N by P produce β<sub>n</sub> phage  
296 particles, and the (1-q) of the infections of E by P that do not abort, produce β<sub>e</sub> phage particles. To  
297 account for the decline in physiological state as the bacteria approach stationary phase, R=0, we  
298 assume phage infection and mutation rates decline at a rate proportional to Eq.1. The lag before  
299 the start of bacterial growth and latent period of phage infection are not considered in this model  
300 or the numerical solution employed to analyze its properties.

301

### 302 **Growth media and strains**

303 Bacterial cultures were grown at 37 °C in MMB broth (LB broth (244620, Difco) supplemented  
304 with 0.1 mM MnCl<sub>2</sub> and 5 mM MgCl<sub>2</sub>). The *E. coli* strain containing the Ec48 retron plasmid  
305 was obtained from Rotem Sorek. The sensitive *E. coli* used for controls was *E. coli* C marked  
306 with streptomycin resistance, and the Ec48 was marked with ampicillin resistance to differentiate  
307 in the invasion experiments. The λ<sup>VIR</sup> phage lysates were prepared from single plaques at 37 °C  
308 in LB medium alongside *E. coli* C. Chloroform was added to the lysates and the lysates were  
309 centrifuged to remove any remaining bacterial cells and debris. The λ<sup>VIR</sup> strain used in these  
310 experiments was obtained from Sylvain Moineau.

### 311 **Sampling bacterial and phage densities**

312 Bacteria and phage densities were estimated by serial dilution in 0.85% saline followed by  
313 plating. The total density of bacteria was estimated on LB hard (1.6%) agar plates. In invasion

314 experiments, diluted samples were placed on LB hard (1.6%) agar plates supplemented with  
315 ampicillin (2.5%) or streptomycin (4%) plates to distinguish retron<sup>+</sup> and retron<sup>-</sup> *E. coli*. To  
316 estimate the densities of free phage, chloroform was added to suspensions before serial dilution.  
317 These suspensions were plated at various dilutions on lawns made up of 0.1 mL of overnight LB-  
318 grown cultures of *E. coli* C (about  $5 \times 10^8$  cells per mL) and 4 mL of LB soft (0.65%) agar on top  
319 of hard (1.6%) LB agar plates.

### 320 **Resistance Testing with Cross Streaks**

321 Bacteria were tested by streaking in straight lines ten colonies from 24-hour plates across 20  $\mu$ L  
322 of a  $\lambda^{\text{VIR}}$  lysate ( $>10^8$  plaque-forming units [pfu]/mL) on LB hard (1.6%) agar plates.  
323 Susceptibility to  $\lambda^{\text{VIR}}$  was noted as breaks in the lines of growth. Continuous lines were  
324 interpreted as evidence for resistance.

### 325 **Growth Rate Estimations**

326 Growth rates were estimated in a Bioscreen C. 48-hour overnights of each strain to be tested  
327 were diluted in MMB broth to an initial density of approximately  $10^5$  cells per ml. 10 replicas of  
328 each strain were loaded into 100-well plates and grown at 37c with shaking for 24 hours taking  
329 OD (600nm) measurements every five minutes.

### 330 **The Liquid culture experiments**

331 Bacterial overnight cultures grown at 37 °C in MMB Broth were serially diluted in 0.85% saline  
332 to approximate initial density and 100  $\mu$ L were added to flasks containing 10 mL MMB.  $\lambda^{\text{VIR}}$   
333 lysate ( $>10^8$  pfum/ml) was serially diluted to an MOI of  $\sim 1$  and 100  $\mu$ L was added to the  
334 appropriate flask. These flasks were sampled for both phage and bacterial initial densities ( $t = 0$   
335 h) and were then grown at 37°C with constant shaking. The flasks were, once again, sampled for  
336 phage and bacterial densities ( $t = 24$  h).

### 337 **Experiments in soft agar cultures**

338 Bacterial cultures grown at 37°C in MMB and  $\lambda^{\text{VIR}}$  lysate were serially diluted in 0.85% saline to  
339 appropriate initial densities. The final dilutions were sampled for phage and bacterial initial  
340 densities and 100  $\mu$ L of diluted phage and bacteria were added to 4 mL of LB soft (0.65%) agar  
341 and poured into small petri dishes which were grown at 37°C. After 24 hours, the agar was placed  
342 into a tube containing 6 mL of saline, vortexed and sonicated in a water bath for 1 hour. These  
343 tubes were serially diluted and sampled for final phage and bacterial densities.

### 344 **Numerical solutions – computer simulations.**

345 To analyze the properties of this model we use Berkeley Madonna to solve the differential  
346 Equations (1) – (7). The growth rate and phage infections parameters used for these simulations  
347 are those estimated for *E. coli* and  $\lambda^{\text{VIR}}$ . Copies of this program are available at [www.eclf.net](http://www.eclf.net).

### 348 **Acknowledgements**

349 We thank Rotem Sorek and his colleagues at the Weitzmann Institute for providing us with the  
350 phage and bacteria used in this study. We are grateful to Ingrid McCall and David Goldberg, for  
351 advice and help with the experimental work. Funds for this research were provided a grant from  
352 the US National Institutes of General Medical Sciences, R35 GM 136407 (BRL).

## 353 References

- 354 1. Yee T, Furuichi T, Inouye S, & Inouye M (1984) Multicopy single-stranded DNA  
355 isolated from a gram-negative bacterium, *Myxococcus xanthus*. *Cell* 38(1):203-209.
- 356 2. Inouye S, Hsu MY, Eagle S, & Inouye M (1989) Reverse transcriptase associated with  
357 the biosynthesis of the branched RNA-linked msDNA in *Myxococcus xanthus*. *Cell*  
358 56(4):709-717.
- 359 3. Temin HM (1989) Reverse transcriptases. Retrons in bacteria. *Nature* 339(6222):254-  
360 255.
- 361 4. Simon DM & Zimmerly S (2008) A diversity of uncharacterized reverse transcriptases in  
362 bacteria. *Nucleic Acids Res* 36(22):7219-7229.
- 363 5. Rice SA & Lampson BC (1995) Phylogenetic comparison of retron elements among the  
364 myxobacteria: evidence for vertical inheritance. *J Bacteriol* 177(1):37-45.
- 365 6. Rice SA, Bieber J, Chun JY, Stacey G, & Lampson BC (1993) Diversity of retron  
366 elements in a population of rhizobia and other gram-negative bacteria. *J Bacteriol*  
367 175(13):4250-4254.
- 368 7. Simon AJ, Ellington AD, & Finkelstein IJ (2019) Retrons and their applications in  
369 genome engineering. *Nucleic Acids Res* 47(21):11007-11019.
- 370 8. Brownell L (2021) Move over CRISPR, the retons are coming. in *Wyss Institute Impact*  
371 *Report*.
- 372 9. Ishino Y, Shinagawa H, Makino K, Amemura M, & Nakata A (1987) Nucleotide  
373 sequence of the *iap* gene, responsible for alkaline phosphatase isozyme conversion in  
374 *Escherichia coli*, and identification of the gene product. *J Bacteriol* 169(12):5429-5433.
- 375 10. Millman A, *et al.* (2020) Bacterial Retrons Function In Anti-Phage Defense. *Cell*  
376 183(6):1551-1561 e1512.
- 377 11. Lopatina A, Tal N, & Sorek R (2020) Abortive Infection: Bacterial Suicide as an  
378 Antiviral Immune Strategy. *Annu Rev Virol* 7(1):371-384.
- 379 12. Fukuyo M, Sasaki A, & Kobayashi I (2012) Success of a suicidal defense strategy against  
380 infection in a structured habitat. *Sci Rep* 2:238.
- 381 13. Berngruber TW, Lion S, & Gandon S (2013) Evolution of suicide as a defence strategy  
382 against pathogens in a spatially structured environment. *Ecol Lett* 16(4):446-453.
- 383 14. Chaudhry WN, *et al.* (2018) Leaky resistance and the conditions for the existence of lytic  
384 bacteriophage. *PLoS Biol* 16(8):e2005971.
- 385 15. Chao L & Levin BR (1981) Structured habitats and the evolution of anticompetitor toxins  
386 in bacteria. *Proc Natl Acad Sci U S A* 78(10):6324-6328.
- 387 16. Monod J (1949) The growth of bacterial cultures. *Annual Review of Microbiology* 3:371-  
388 394.
- 389 17. Stewart FM & Levin BR (1973) Resource partitioning and the outcome of interspecific  
390 competition: a model and some general considerations. *American Naturalist* 107:171-  
391 198.

- 392 18. Chao L, Levin BR, & Stewart FM (1977) A complex community in a simple habitat: an  
393 experimental study with bacteria and phage. *Ecology* 58:369-378.  
394
